# Supplementary material
Source: PubMed Central journal article supplement (PMC3121365)
Supplement: supp_M110.201871_jbc.M110.201871-3.pdf [file supp_M110.201871_jbc.M110.201871-3.pdf]

**Figure S3.**

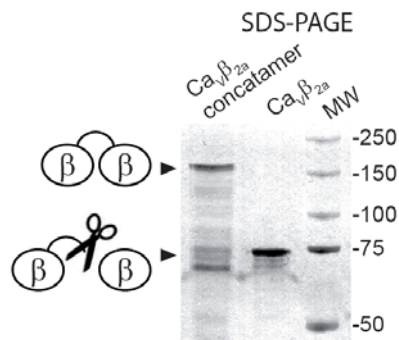

**Fig. S3.** SDS-PAGE of recombinant Ca<sub>v</sub>β<sub>2a</sub> concatamer. Ca<sub>v</sub>β Ca<sub>v</sub>β<sub>2a</sub> concatamer was expressed and purified as previously described for Ca<sub>v</sub>β (1). The expected molecular masses for concatamer and monomer Ca<sub>v</sub>β<sub>2a</sub> are marked with arrows. This multiplicity of bands may be explained by proteolytic digestion of concatamers constructs as reported elsewhere (2).

1. Hidalgo, P., Gonzalez-Gutierrez, G., Garcia-Olivares, J. & Neely, A. (2006) *J. Biol. Chem.* **281**, 24104-24110.
2. Nicke, A., Rettinger, J. & Schmalzing, G. (2003) *Mol. Pharmacol.* **63**, 243-252.
