# Supplementary material
Source: PubMed Central journal article supplement (PMC3121365)
Supplement: supp_M110.201871_jbc.M110.201871-4.pdf [file supp_M110.201871_jbc.M110.201871-4.pdf]

## Figure S1

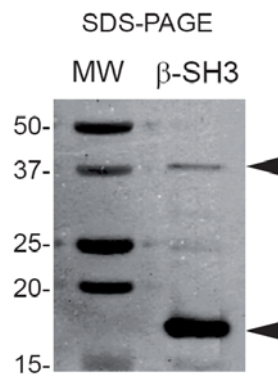

**Fig. S1.** SDS-PAGE of recombinant  $\beta$ -SH3 in the absence of DTT.  $\beta$  SH3 was expressed and purified as previously described (1). Two bands are visible indicating that a small fraction of recombinant  $\beta$  SH3 is resistant to SDS denaturation. The identity of both bands was confirmed by mass spectrometry analysis performed in the Mass spectrometry laboratory, Zentrum für Pharmakologie und Toxikologie, Medizinische Hochschule Hannover. The protein was digested by trypsin and the peptides were analyzed in Ultraflex MALDI-TOF/TOF Mass Spectrometer (Bruker Daltonics).

1. Gonzalez-Gutierrez, G., Miranda-Laferte, E., Neely, A. & Hidalgo, P. (2007) *J Biol Chem* **282**, 2156-2162.
