# Supplementary material
Source: PubMed Central journal article supplement (PMC3121365)
Supplement: supp_M110.201871_jbc.M110.201871-5.pdf [file supp_M110.201871_jbc.M110.201871-5.pdf]

**Figure S2**

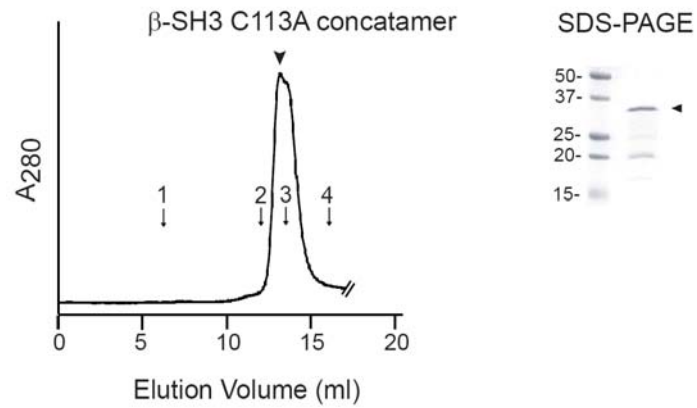

**Fig. S2.** Size-exclusion chromatography profile from Superdex 200 10/30 column (GE Healthcare Life Sciences) of recombinant  $\beta$ -SH3 C113A concatamer. The corresponding elution volume for  $\beta$ -SH3 concatamer wild-type from Figure 1 in main text is denoted with an arrow. Numbers correspond to the elution volume of: 1, void volume and 2, 3 and 4 to molecular mass standards of Albumin (67 kDa), Ovalbumin (43 kDa), and Ribonuclease A (13.7 kDa), respectively. The inset shows  $\beta$ -SH3 C113A concatamer resolved onto reducing SDS-PAGE.
